# Supplementary material for: Deficiency of Cbl-b Gene Enhances Infiltration and Activation of Macrophages in Adipose Tissue and Causes Peripheral Insulin Resistance in Mice
Source: Oxford University Press journal article supplement (doi:10.2337/db06-1768), 2007-09-05
Supplement: db061768onlineappen.doc [file db061768onlineappen.doc]

#### SUPPLEMENTARY MATERIALS AND METHODS

**Preparation of Stromal-vascular (SV) and adipocyte fractions from WAT.** Epididymal WAT was digested with collagenase type I (Washington, Lakewood, NJ), at 37°C for 1 h. The sample was centrifuged at 300 x *g* for 5 min at 4°C. The pellets and supernatant were collected as SV and adipocyte fractions, respectively.

#### Western blot analysis and immunoprecipitation. The primary antibodies were as follows: anti-C3G, anti-Cbl-b, anti-Vav1 (Santa Cruz Biotechnology, Santa Cruz, CA), anti-c-Cbl, anti-phospho-tyrosine (Upstate, Lake Placid, NY), anti-F4/80 (Serotec), anti-IRS-1 (Calbiochem, San Diego, CA), anti-phospho-Akt, anti-phospho-c-Cbl (Cell Signaling Technology, Beverly, MA), anti-Akt, anti-caveolin (BD, Bioscience, Bedford, MA) and anti--actin (Oncogene Research Products, San Diego, CA) antibodies. For immunoprecipitation assay, the extracted sample (100 g protein) from primary cultured macrophages was incubated with an anti-Vav1 antibody preadsorbed to protein G-Sepharose overnight at 4°C. The immunopellets were subjected to western blotting of phospho-tyrosine.

**Immunohistochemistry.** Mouse WAT and pancreas were fixed with 4% paraformaldehyde and embedded in paraffin wax. Sections were incubated with primary antibodies, such as anti-Cbl-b (Santa Cruz), anti-CD4, anti-CD8, and anti-CD68 antibodies (Serotec). After washing with PBS, the bound antibody was visualized with the appropriate secondary Alexa-conjugated anti-IgG antibody (Molecular Probes).

#### Supplementary Results and Discussion

**Cbl-b expression in 3T3-L1- and SV-fraction-derived preadipocytes.** The amounts of Cbl-b protein hardly expressed in 3T3-L1-derived preadipocytes and adipocytes, and SV-fraction-derived preadipocytes, compared with peripheral macrophages (Supplementary Fig. 1). Cbl-b was hardly detected in adipocytes of WAT (Fig. 4A). Taken together, we conclude that the increases in Cbl-b in WAT are due to infiltration of macrophages into the tissue.

**Inflammation in Langerhans' islands in Cbl-b-deleted or -deficient mutants.** By using Komeda diabetes-prone (KDP) rats, which exhibit spontaneous human type I diabetes, Yokoi et al. (S1) performed positional cloning and identified a nonsense mutation (arginine to a stop codon 455) in Cbl-b gene. They suggested that Cbl-b is a major susceptibility gene for rat type I diabetes. Mutation of Cbl-b caused severe pancreatitis and hypoinsulinemia. In the present study, CD4, CD8 and CD68-positive mononuclear cells infiltrated the neighboring areas of several Langerhans' islands in Cbl-b-/- mice, although no diffuse infiltration of immune-related cells was noted in Langerhans' islands. These findings suggest that lack of Cbl-b activates immune-related cells and induces their infiltration into the pancreas. Since the proline-rich domain of Cbl-b interacts with the SH3 domain of Vav1 (S2), the C-terminus-truncated Cbl-b in KDP rat may lose the binding activity to Vav1. Therefore, loss of this binding activity may predispose to pancreatitis in KDP rats.

**Possible effects of proinflammatory cytokines from infiltrated macrophages on insulin secretion.** Insulin secretion was stimulated rather than suppressed in our mice. Although fasting serum glucose levels were similar, serum insulin concentrations were higher in Cbl-b-/- mice than in Cbl-b+/+ mice. Based on the results of glucose uptake and hyperinsulinemic euglycemic clamp tests (Fig. 3B and C), we concluded that these changes were due to peripheral insulin resistance. However, in this study, CD4, CD8 and CD68-positive mononuclear cells infiltrated the neighboring areas of several Langerhans' islands in Cbl-b-/- mice (Fig. 2B and C). Hence, it is possible that these mononuclear cells (T cells and macrophages) secrete proinflammatory cytokines and stimulate insulin release from  cells. This is particularly important since inflammatory cytokines, especially TNF-, have been reported to stimulate insulin secretion from  cells (S3).

**Distinct role of Cbl-b in glucose metabolism from that of c-Cbl.** Unlike Cbl-b-/- mice, c-Cbl deficiency reduced adiposity and improved peripheral insulin actions in mice (S4). In c-Cbl-/- mice, increased sensitivity to insulin in skeletal muscle through enhanced insulin receptor expression contributed to these phenomena (S4), and c-Cbl deficiency did not affect glucose uptake in WAT (S4). A recent study showed that Cbl-b, but not c-Cbl, is a negative regulator of TNF-, IL-6 and MCP-1 produced by bone-marrow-derived mast cells (S5). Cbl-b plays a distinct role in glucose metabolism from c-Cbl, although both Cbls increased in fat in an age-dependent manner.

**Supplementary References**

S1. Yokoi N, Komeda K, Wang HY, Yano H, Kitada K, Saitoh Y, Seino Y, Yasuda K, Serikawa T, Seino S: Cblb is a major susceptibility gene for rat type 1 diabetes mellitus. *Nat Genet* 31:391-394, 2002

S2. Bustelo XR, Crespo P, Lopez-Barahona M, Gutkind JS, Barbacid M: Cbl-b, a member of the Sli-1/c-Cbl protein family, inhibits Vav-mediated c-Jun N-terminal kinase activation. *Oncogene* 15:2511-2520, 1997

S3. Parkashi J, Chaudhry MA, Rhoten WB: Tumor necrosis factor--induced changes in insulin-producing -cells. *Anat Rec A Discov Mol Cell Evol Biol* 286:982-993, 2005

S4. Molero JC, Jensen TE, Withers PC, Couzens M, Herzog H, Thien CB, Langdon WY, Walder K, Murphy MA, Bowtell DD, James DE, Cooney GJ: c-Cbl-deficient mice have reduced adiposity, higher energy expenditure, and improved peripheral insulin action. *J Clin Invest* 114:1326-1333, 2004

S5. Gustin SE, Thien CB, Langdon WY: Cbl-b is a negative regulator of inflammatory cytokines produced by IgE-activated mast cells. *J Immunol* 177:5980-5989, 2006

S6. Nikawa T, Nakao R, Asanoma Y, Hayashi R, Furochi H, Hirasaka K, Kishi K: A skeletal muscle-derived secretory protein, attractin, upregulates UCP-2 expression in mouse 3T3-L1 adipocytes. *Biol Sci Space* 20:33-39, 2006

**Supplementary Table**

**Supplementary Table 1.** Primers for polymerase chain reaction

| Target gene |  | Sequence | Length (bp) | |  |
| --- | --- | --- | --- | --- | --- |
| ADAM8 | S  AS | 5’- GCAGCCGACTCCTGCTATAC -3’  5’- CTCCATGGTTGGAGGAGAAA -3’ | | 151 | |
| CD68 | S  AS | 5’- ccaattcagggtggaagaaa -3’  5’- ctcgggctctgatgtaggtc -3’ | | 188 | |
| F4/80 | S  AS | 5’- GCTGTGAGATTGTGGAAGCA -3’  5’- CTGTACCCACATGGCTGATG -3’ | | 135 | |
| TNF- | S  AS | 5’- ATGGCCTCCCTCTCATCAGTT -3’  5’- ACAGGCTTGTCACTCGAATTTTG -3’ | | 78 | |
| IL-6 | S  AS | 5’- ACAACCACGGCCTTCCCTACTT -3’  5’- CACGATTTCCCAGAGAACATGTG -3’ | | 188 | |
| Leptin | S  AS | 5’- GTGCTGCAGATAGCCAATGA -3’  5’- CTCAAAGCCACCACCTCTGT -3’ | | 164 | |
| Adiponectin | S  AS | 5’-TGTTGGAATGACAGGAGCTG’  5’-CGAATGGGTACATTGGGAAC-3’ | | 128 | |
| Rps3 | S  AS | 5’-ATCAGAGAGTTGACCGCAGTTG-3’  5’-AATGAACCGAAGCACACCATAG-3’ | | 182 | |
| MCP-1 | S  AS | 5’- CCCAATGAGTAGGCTGGAGA -3’  5’- TCTGGACCCATTCCTTCTTG -3’ | | 125 | |
| 36B4 | S  AS | 5’-CTTCATTGTGGGAGCAGACA-3’  5’-TCTCCAGAGCTGGGTTGTTC-3’ | | 149 | |
| PEPCK | S  AS | 5’-GGTTCCGGAAGGACAAAGAT-3’  5’-CCTTAGGGATGTAGCCGATG-3’ | | 135 | |
| G6Pase | S  AS | 5’-CTGTGCAGCTGAACGTCTGT-3’  5’-GGAGGCTGGCATTGTAGATG-3’ | | 138 | |
| SREBP-1c | S  AS | 5’-gcagactcactgctgctgac-3’  5’-aggtactgtggccaagatgg-3’ | | 150 | |
| PLA2-IB | S  AS | 5’-caacaaatgcgaggacttca-3’  5’-acagaatttcccggtgtcaa-3’ | | 109 | |
| -Actin | S  AS | 5’-CCCTAAGGCCAACCGTGAAA-3’  5’-ACGACCAGAGGCATACAGGGA-3’ | | 109 | |

AS, antisense primer; S, sense primer; ADAM8, a disintegrin-like and metalloproteinase; TNF-, tumor necrosis factor-alpha; IL-6, interleukin-6; Rps3, ribosomal protein S3; MCP-1, monocyte chemoattractant protein-1; G6Pase, glucose-6-phosphatase; SREBP-1c, sterol regulatory element binding protein-1c; PLA2-IB, phospholipase A2-IB.

**Supplementary Figure Legends**

**Supplementary Fig. 1.** **Expression of Cbl-b in preadipocytes derived from 3T3-L1 or SV fraction.** *A* and *B*: Mouse 3T3-L1 fibroblasts were treated with 0.25 M dexamethasone, 5 g/ml insulin and 0.5 mM 3-isobutyl-1-methylxanthine (Day 0) and then cultured for the indicated days to allow their differentiation, as described in our previous study (S6) (A). Preadipocytes in the stromal-vascular (SV) fraction and peritoneal macrophages (M) were prepared from 4-week-old Cbl-b+/+ mice (B). Proteins (40 g/lane) were subjected to SDS-8% PAGE, followed by western blotting for Cbl-b and -actin. Similar results were obtained in four separate experiments.
